# Supplementary material
Source: Springer Nature journal article supplement (https://www.springermedizin.de/resource/supplementary/12987_2007_288_MOESM3_ESM.pdf/9611726)

Pressure

Chiari

normal

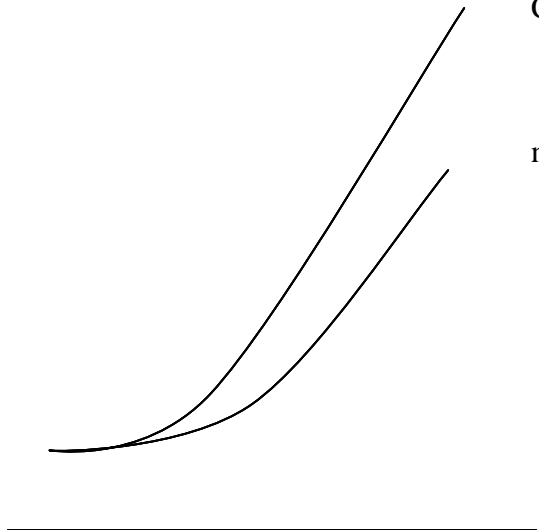

Volume

Supplement: MOESM3 [file 9611726]
